# Supplementary material for: Identifying novel β-lactamase substrate activity through in silico prediction of antimicrobial resistance
Source: PubMed Central journal article supplement (PMC8115898; doi:10.1099/mgen.0.000500), 2021-01-08
Supplement: mgen-7-500-s001.pdf [file mgen-7-500-s001.pdf]

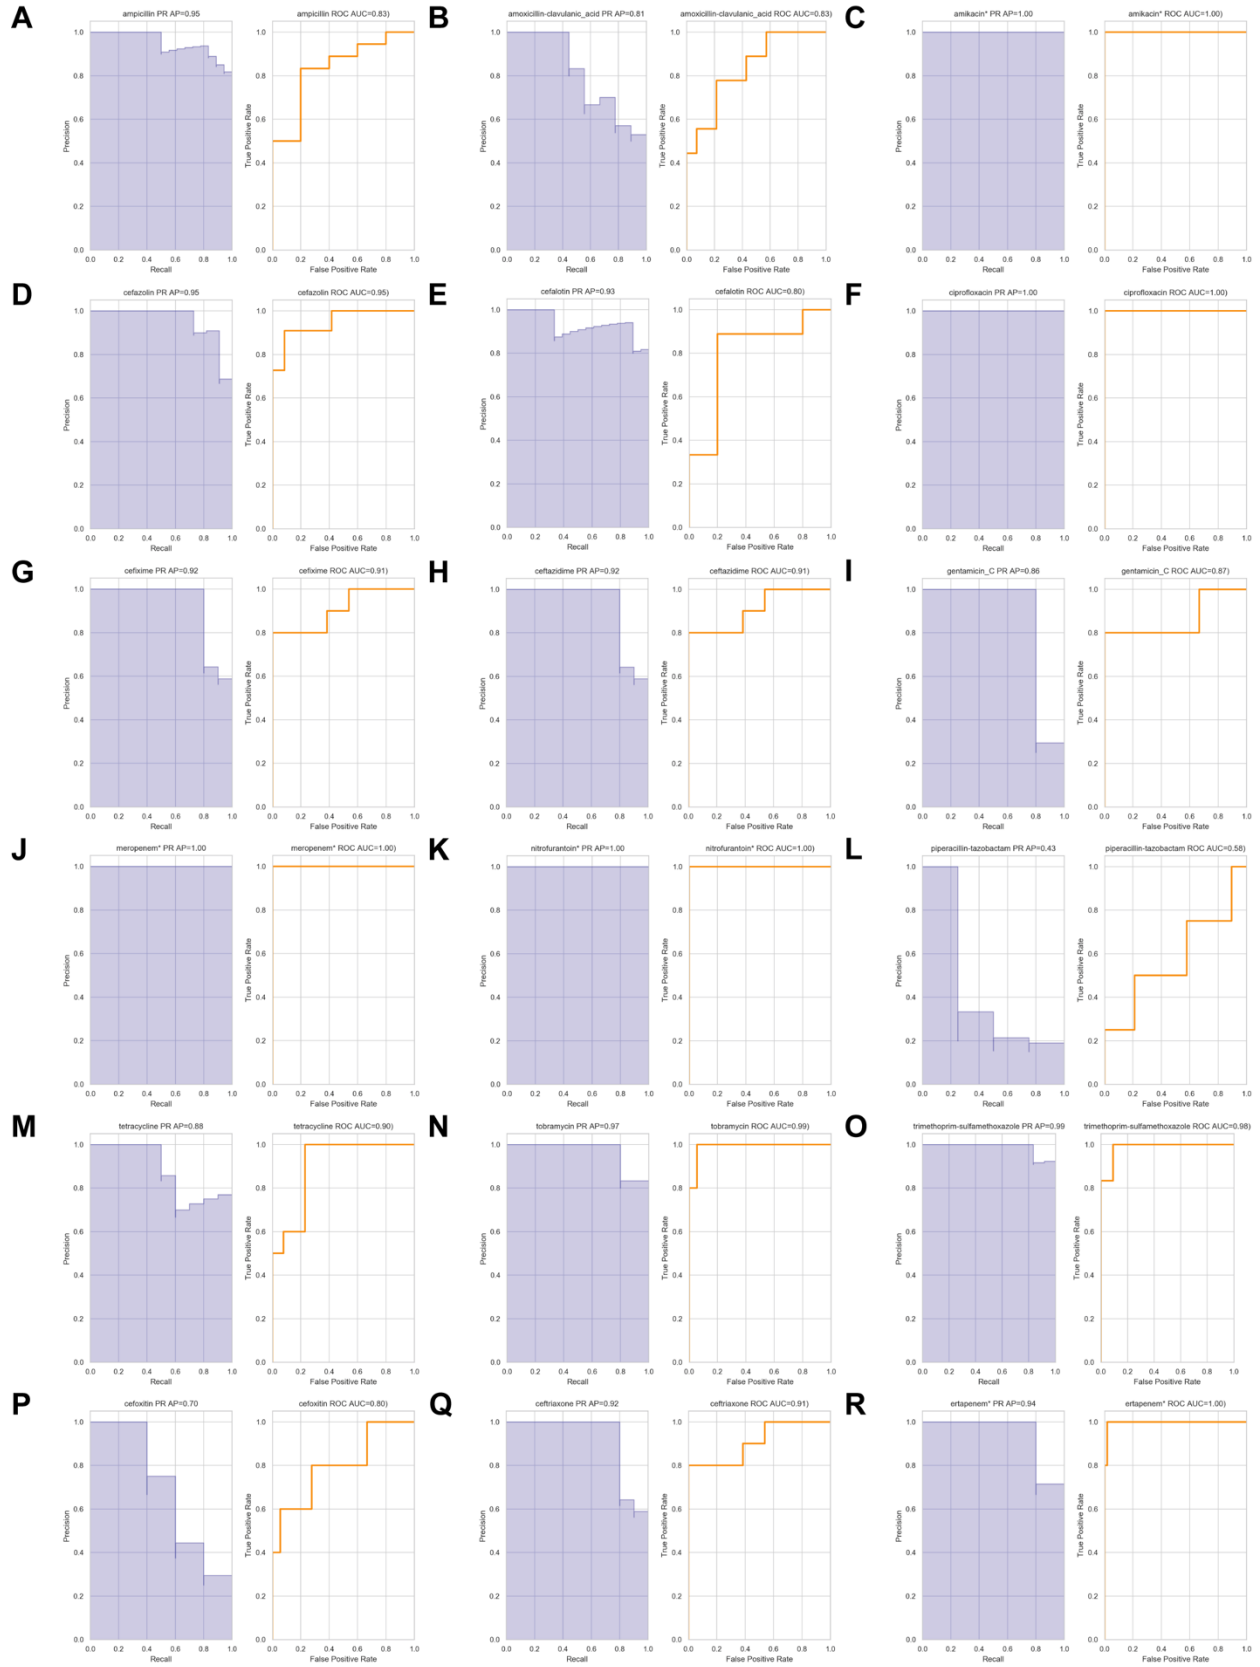

**Figure S1. Precision-Recall (PR) and Receiver Operating Characteristic (ROC) curves for logistic regression models developed for *E. coli* antibiotic resistance phenotype prediction.** Models for (A) ampicillin, (B) amoxicillin-clavulanic acid, (C) amikacin, (D) ceftazidime, (E) cefazolin, (F) ciprofloxacin, (G) cefixime, (H) ceftazidime, (I) gentamicin, (J) meropenem, (K) nitrofurantoin, (L) piperacillin-tazobactam, (M) tetracycline, (N) tobramycin, (O) trimethoprim-sulfamethoxazole, (P) ceftazidime, (Q) ceftriaxone, (R) ertapenem which <10% of a species' isolates displayed susceptible or resistant phenotypes could not be properly validated and tested (4 antibiotics for *E. coli*), so were trained using all the data (indicated by an asterisk).

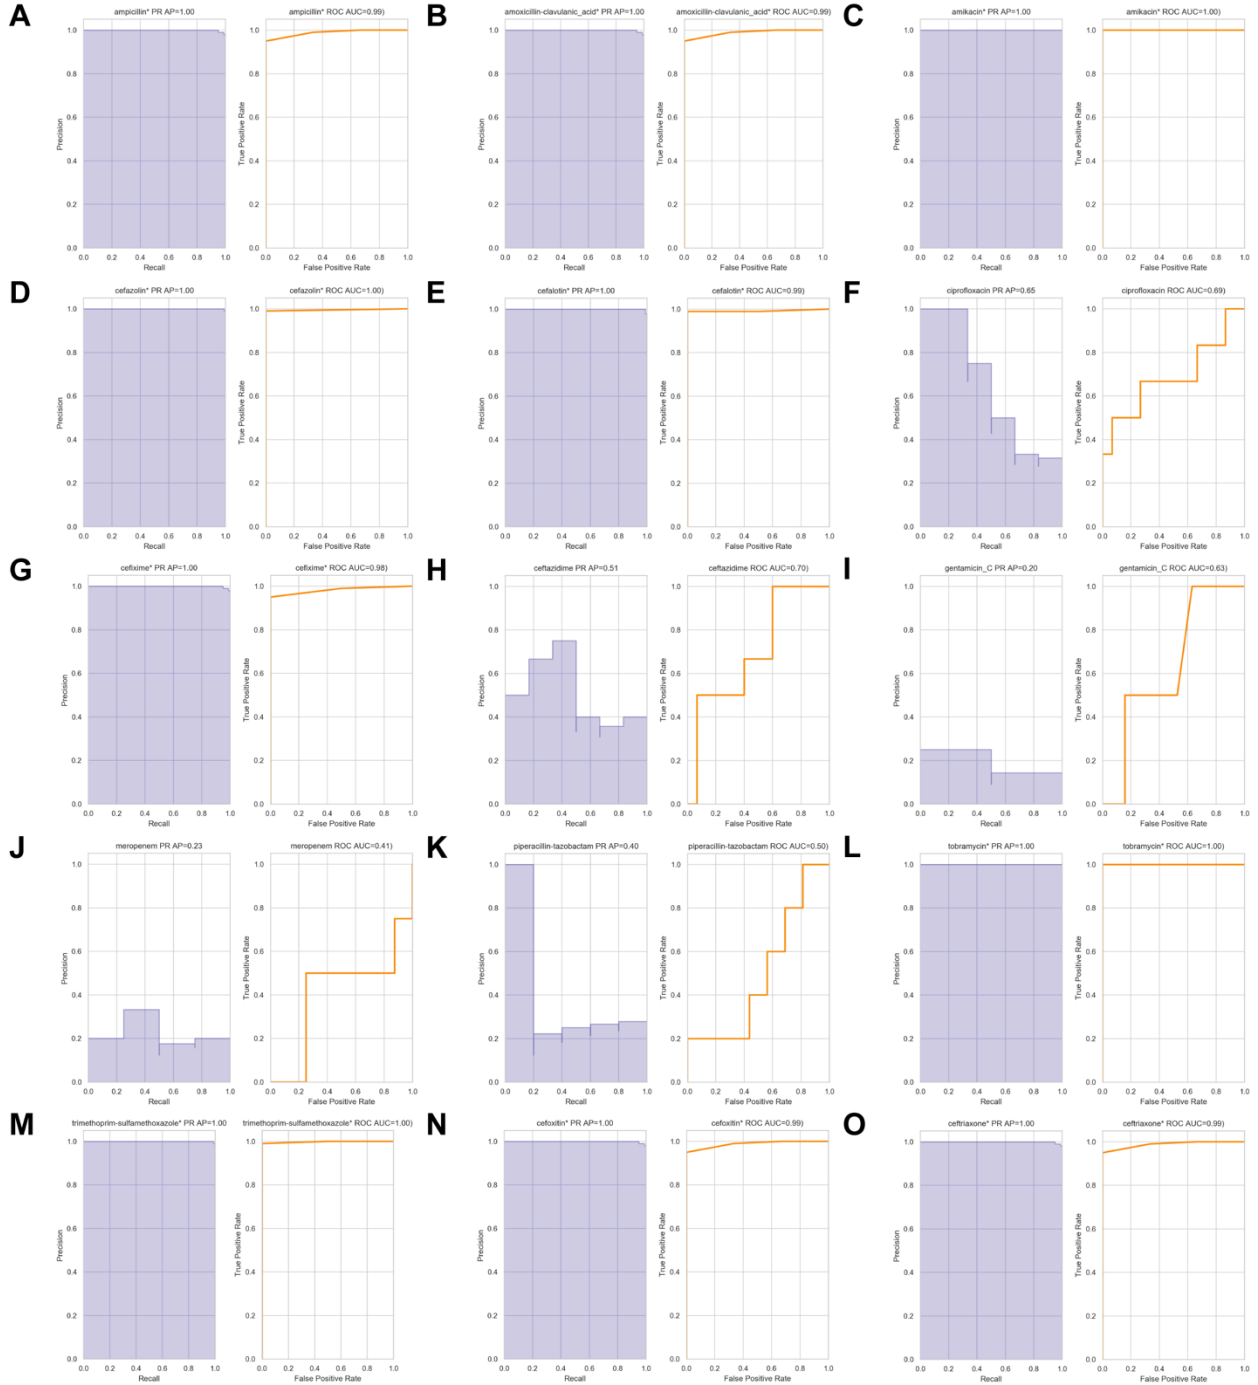

**Figure S2. Precision-Recall (PR) and Receiver Operating Characteristic (ROC) curves for logistic regression models developed for *P. aeruginosa* antibiotic resistance phenotype prediction.** Models for (A) ampicillin, (B) amoxicillin-clavulanic acid, (C) amikacin, (D) cefazolin, (E) cefalotin, (F) ciprofloxacin, (G) cefixime, (H) ceftazidime, (I) gentamicin, (J) meropenem, (K) piperacillin-tazobactam, (L) tobramycin, (M) trimethoprim-sulfamethoxazole, (N) cefalotin, (O) ceftazidime resistance which <10% of a species' isolates displayed susceptible or resistant phenotypes could not be properly validated and tested (10 antibiotics for *P. aeruginosa*), so were trained using all the data (indicated by an asterisk). Tetracycline, nitrofurantoin, and ertapenem resistance prediction models could not be developed for the following reasons. All isolates were resistant to tetracycline and nitrofurantoin, thus a 'dummy' model was used which always returns the relevant label. Ertapenem phenotypic AST was not performed for *P. aeruginosa*.

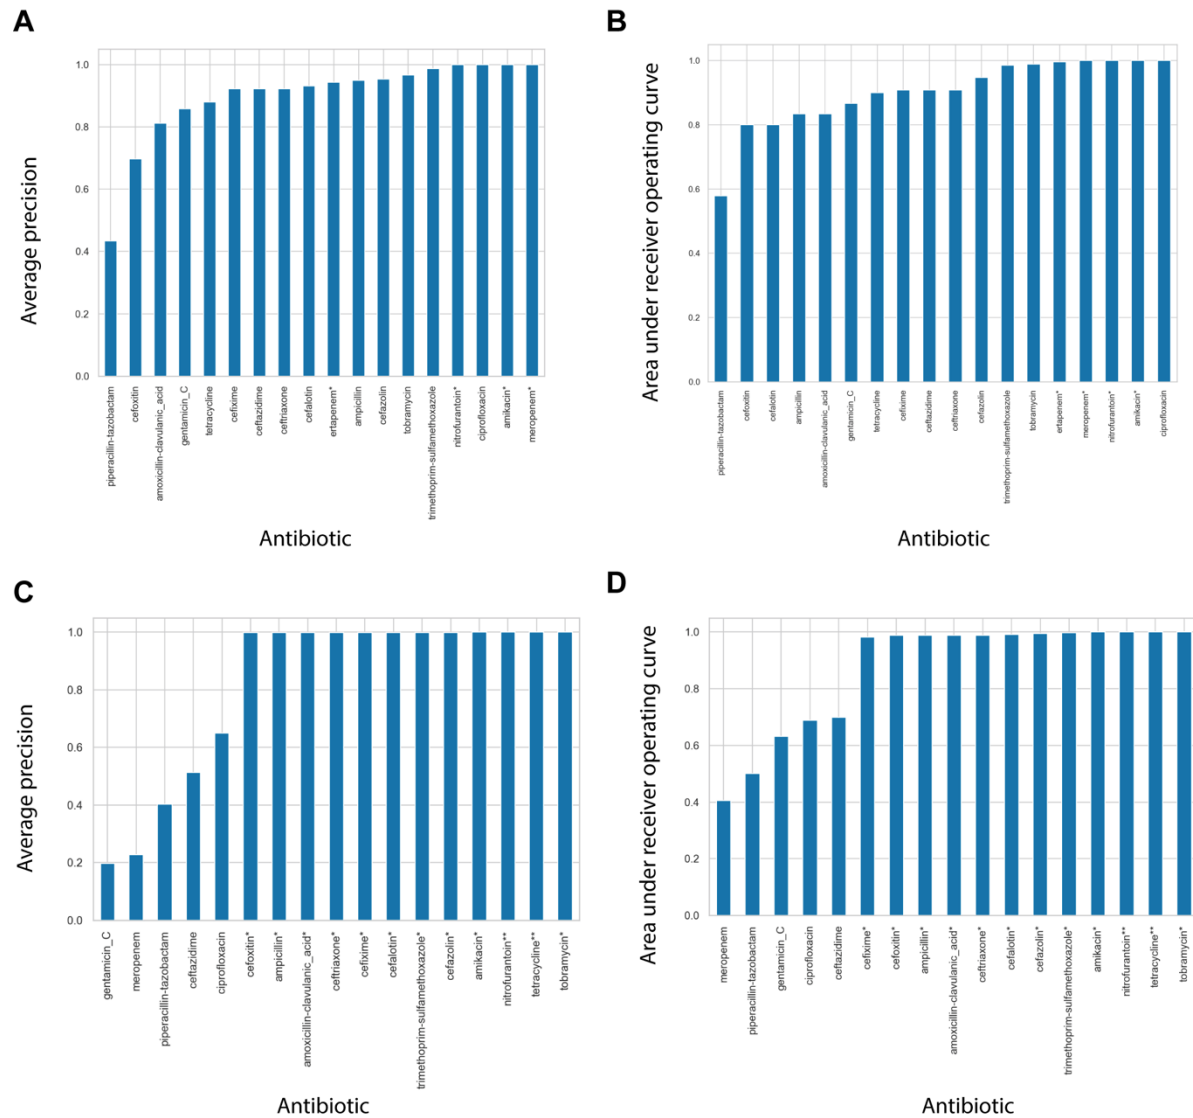

**Figure S3. Average precision and area under Receiver Operating Characteristic (ROC) graphs for (A, B) *E. coli* and (C, D) *P. aeruginosa* logistic regression models used for resistance phenotype prediction.** X-axis indicates the antibiotic tested whereas the y-axis indicates the (A, C) average precision or the (B, D) area under the ROC curve for each logistic regression model. Models for antibiotics for which <10% of a species' isolates displayed susceptible or resistant phenotypes could not be properly validated and tested (10 antibiotics for *P. aeruginosa* and 4 antibiotics for *E. coli*), so were trained using all the data (indicated by an asterisk).

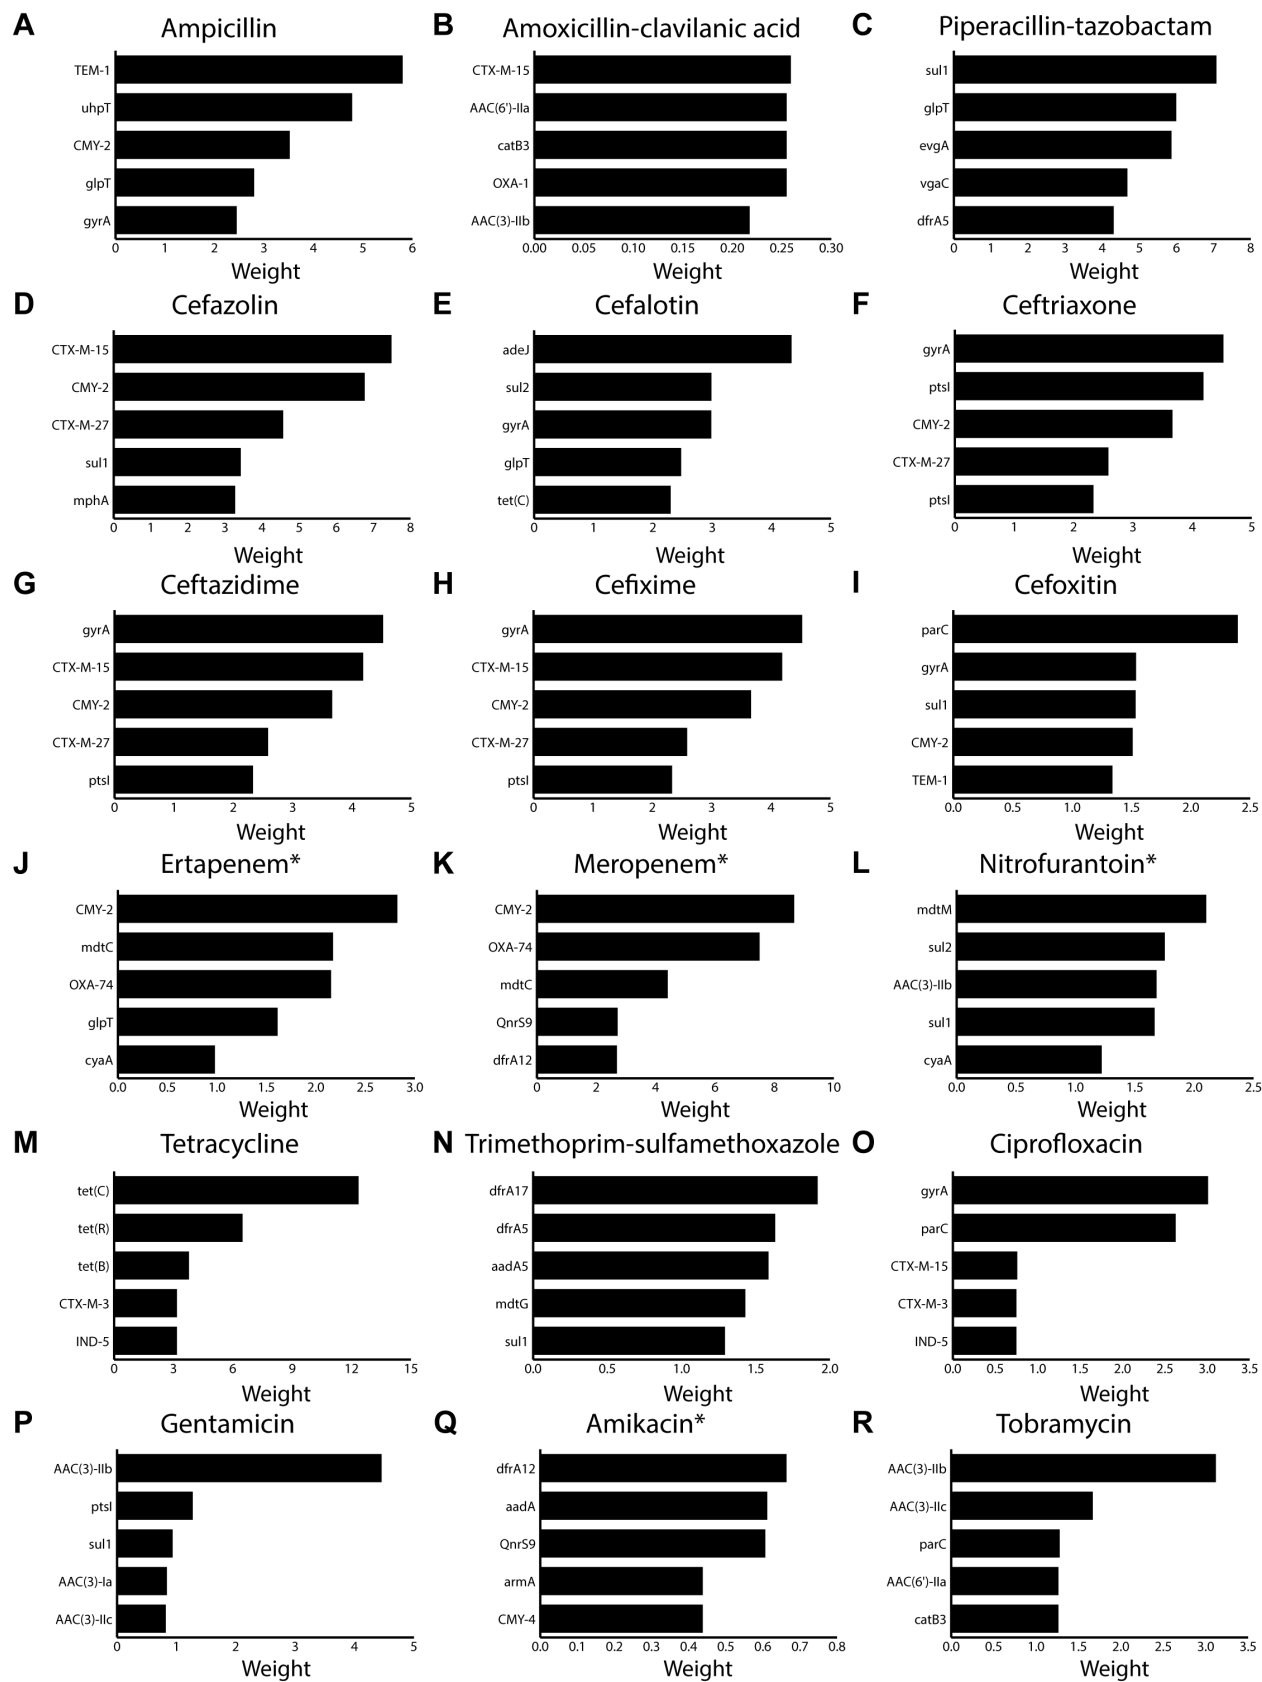

**Figure S4. The top five highest weights of importance for *E. coli* antibiotic resistance phenotype prediction.** The x-axis indicates assigned LR weights for individual antibiotics, while the y-axis list the top five weighted AMR determinants. Models for (A) ampicillin, (B) amoxicillin-clavulanic acid, (C) piperacillin-tazobactam, (D) cefazolin, (E) cefalotin, (F) ceftriaxone, (G) ceftazidime, (H) cefixime, (I) ceftiofur, (J) ertapenem, (K) meropenem, (L) nitrofurantoin, (M) tetracycline, (N) trimethoprim-sulfamethoxazole, (O) ciprofloxacin, (P) gentamicin (Q) amikacin, (R) tobramycin resistance which <10% of a species' isolates displayed susceptible or resistant phenotypes could not be properly validated and tested (4 antibiotics for *E. coli*), so were trained using all the data (indicated by an asterisk).

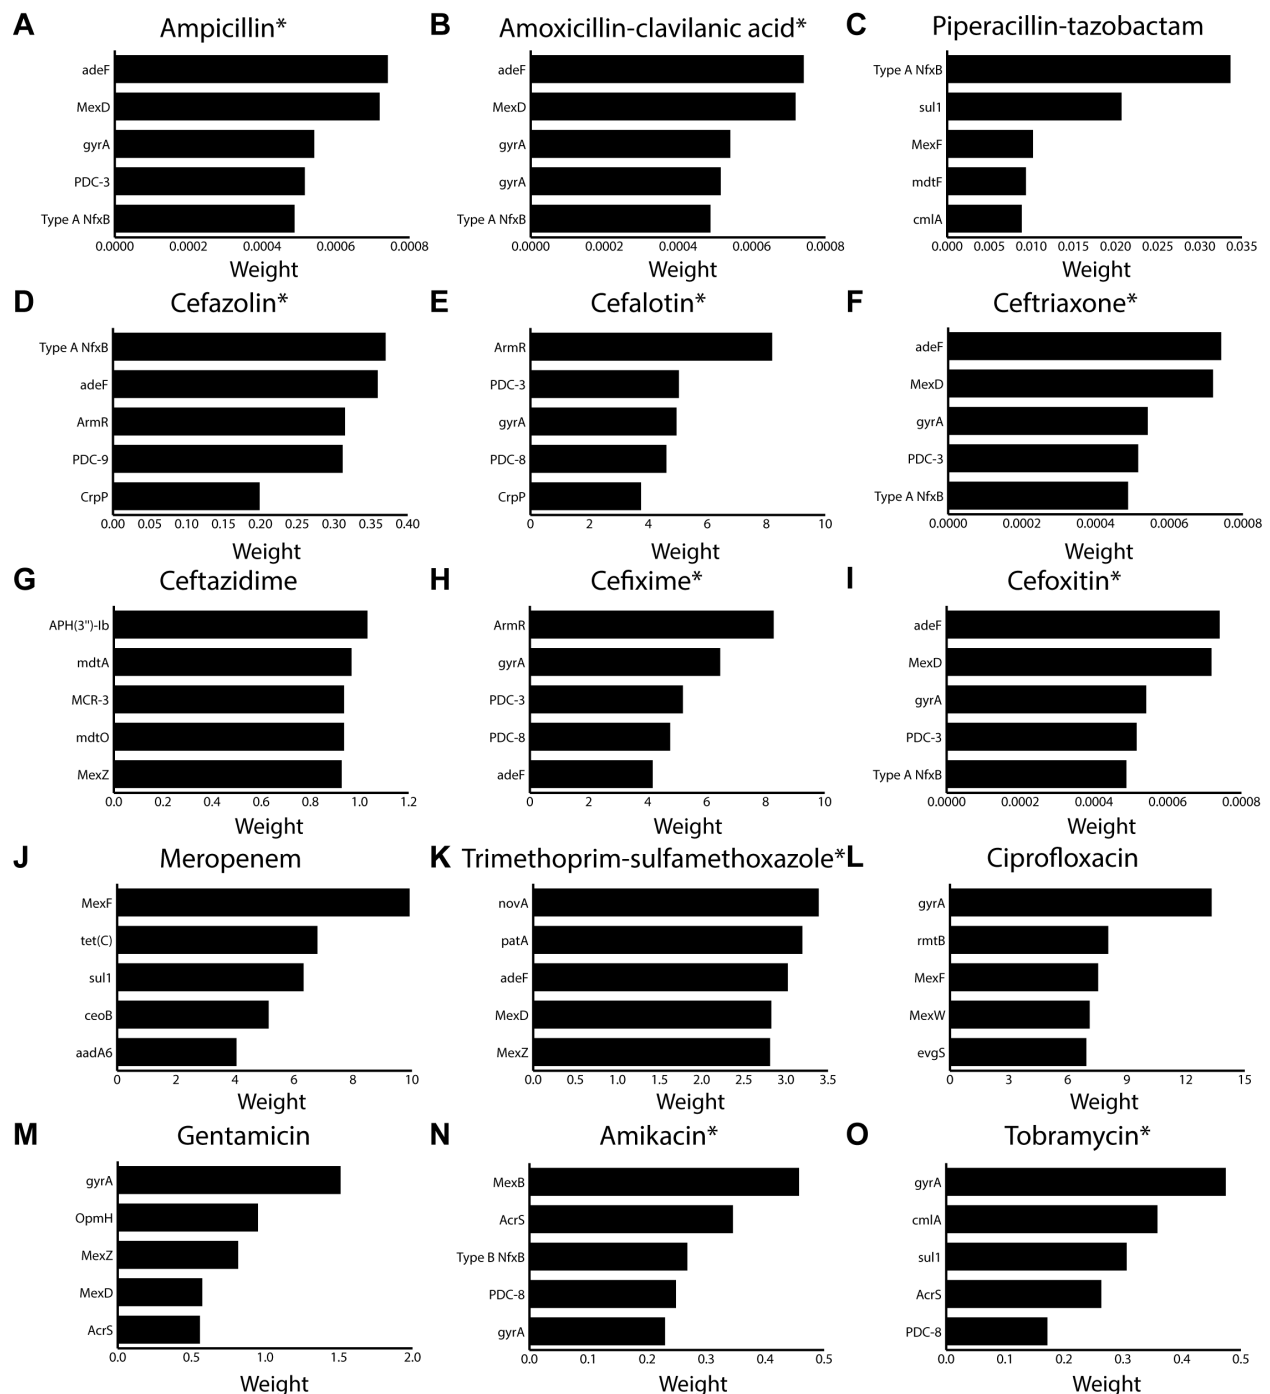

**Figure S5. The top five highest weights of importance for *P. aeruginosa* antibiotic resistance phenotype prediction.** The x-axis indicates assigned LR weights for individual antibiotics, while the y-axis list the top five weighted AMR determinants. Models for (A) ampicillin, (B) amoxicillin-clavulanic acid, (C) piperacillin-tazobactam, (D) cefazolin, (E) cefalotin, (F) ceftriaxone, (G) ceftazidime, (H) cefixime, (I) cefoxitin, (J) meropenem, (K) trimethoprim-sulfamethoxazole, (L) ciprofloxacin, (M) gentamicin, (N) amikacin, (O) tobramycin resistance which <10% of a species' isolates displayed susceptible or resistant phenotypes could not be properly validated and tested (10 antibiotics for *P. aeruginosa*), so were trained using all the



data (indicated by an asterisk). Tetracycline, nitrofurantoin, and ertapenem resistance prediction models could not be developed for the following reasons. All isolates were resistant to tetracycline and nitrofurantoin, thus a 'dummy' model was used which always returns the relevant label. Ertapenem phenotypic AST was not performed for *P. aeruginosa*.

- False negative (prediction: susceptible, lab observation: resistance)
- True negative (prediction: susceptible, lab observation: susceptible)
- True positive (prediction: resistance, lab observation: resistance)

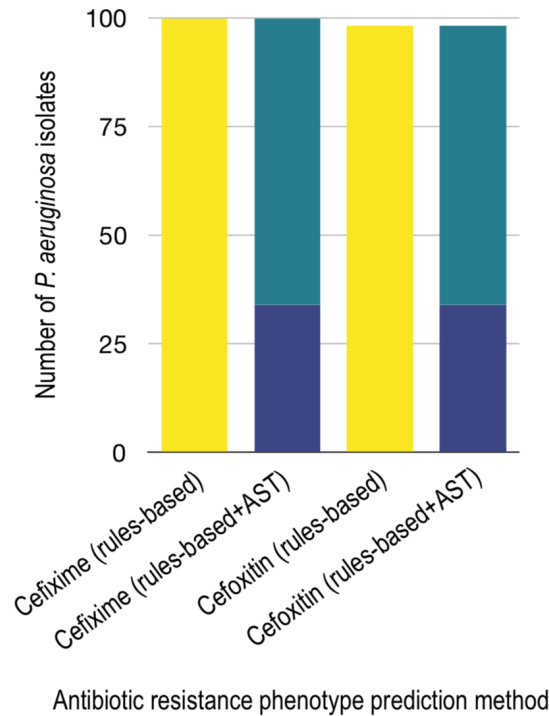

**Figure S6. Improvement of *P. aeruginosa* cefixime and cefoxitin resistance prediction using information gained from ASTs, RGI and ARO.** Through antibiotic susceptibility testing (AST), we observed PDC-3 and PDC-5 conferring resistance to cefixime and cefoxitin. Curating this knowledge into CARD would improve cefixime and cefoxitin resistance true positive prediction in *P. aeruginosa* by 34.0% and 34.7%, respectively. However, there are no CLSI breakpoint guidelines for cefixime and cefoxitin because they are not used clinically to treat *P. aeruginosa* infections.
